# Supplementary material for: Exploring cancer patients' experiences and acceptability of Traditional Chinese Medicine techniques: a qualitative study
Source: Research Square preprint supplement (doi:10.21203/rs.3.rs-6672935/v1), 2025-06-16
Supplement: Supplementary file 1 [file d958a1b937fdef7e61f84347.docx]

**Additional file 1: Interview guide**

|  | Semi-structured interview guide |
| --- | --- |
| 1 | What have your experiences been with using Traditional Chinese Medicine techniques? |
| 2 | What are your views on Traditional Chinese Medicine techniques after experiencing them? |
| 3 | What factors have promoted your acceptance of Traditional Chinese Medicine techniques? |
| 4 | What factors have hindered your acceptance of Traditional Chinese Medicine techniques? |
| 5 | Would you be willing to continue using Traditional Chinese Medicine techniques? Please explain your reasons or opinions. |
